# Supplementary material
Source: publisher site journal article supplement (https://www.dovepress.com/article/398450)
Supplement: Supplementary file 1 [file get_supplementary_file.php]

**Appendix 1: Measurement Items**

Interplay between financial literacy, financial risk tolerance, and financial behavior: the moderator effect of emotional intelligence

Financial literacy: by considering the following statements, please express your perceptions on a five-point scale (1 = strongly disagree, 2 = disagree, 3 = neutral, 4 = agree, 5 = strongly agree) (Thung *et al.,* 2012)56

| **Questions** | **Measures** |
| --- | --- |
| Question 1 | I know what inflation and interest rates changes mean |
| Question 2 | I make a price comparison when buying a product or service |
| Question 3 | I pay attention to the price/performance ratio when buying a product or service |
| Question 4 | I have knowledge about financial products |

Emotional Intelligence: by considering the following statements, please express your perceptions on a five-point scale (1 = strongly disagree, 2 = disagree, 3 = neutral, 4 = agree, 5 = strongly agree) (Wong & Law, 2002)42

| **Questions** | **Measures** |
| --- | --- |
| Question 1 | I have a good sense of why I have certain feelings most of the time. |
| Question 2 | I have good understanding of my own emotions. |
| Question 3 | I really understand what I feel. |
| Question 4 | I always know whether or not I am happy. |
| Question 5 | I always know my friends’ emotions from their behavior. |
| Question 6 | I am a good observer of others’ emotions. |
| Question 7 | I am sensitive to the feelings and emotions of others. |
| Question 8 | I have good understanding of the emotions of people around me. |
| Question 9 | I always set goals for myself and then try my best to achieve them. |
| Question 10 | I always tell myself I am a competent person. |
| Question 11 | I am a self-motivated person. |
| Question 12 | I would always encourage myself to try my best. |
| Question 13 | I am able to control my temper and handle difficulties rationally. |
| Question 14 | I am quite capable of controlling my own emotions. |
| Question 15 | I can always calm down quickly when I am very angry. |
| Question 16 | I have good control of my own emotions. |

Financial risk tolerance: by considering the following statements, please express your perceptions the following options (Grable & Lytton, 1999)57

| **Questions** | **Measures** |
| --- | --- |
| Question 1 | In general, how would your best friend describe you as a risk taker? |
| Question 2 | You are on a TV game show and can choose one of the following, which would you take? |
| Question 3 | You have just finished saving for a “once-in-a-lifetime” vacation. Three weeks before you plan to leave, you lose your job. You would: |
| Question 4 | If you unexpectedly received PKR 2,000,000 to invest, what would you do? |
| Question 5 | In terms of experience, how comfortable are you investing in stocks or stock mutual funds? |
| Question 6 | When you think of the word “risk,” which of the following words comes to mind first? |
| Question 7 | Some experts are predicting prices of assets such as gold, jewels, collectibles, and real estate (hard assets) to increase in value; bond prices may fall, however, experts tend to agree that government bonds are relatively safe. Most of your investment assets are now in high interest government bonds. What would you do? |
| Question 8 | Given the best and worst case returns of the four investment choices below, which would you prefer? |
| Question 9 | In addition to whatever you own, you have been given PKR 100,000. You are now asked to choose between: |
| Question 10 | In addition to whatever you own, you have been given PKR 200,000. You are now asked to choose between: |
| Question 11 | Suppose a relative left you an inheritance of PKR 10,000,000 stipulating in the will that you invest ALL the money in ONE of the following choices. Which one would you select? |
| Question 12 | If you had to invest PKR 2,000,000 which of the following investment choices would you find most appealing? |
| Question 13 | Your trusted friend and neighbor, an experienced geologist, is putting together a group of investors to fund an exploratory gold mining venture. The venture could pay back 50 to 100 times the investment if successful. If the mine is a bust, the entire investment is worthless. Your friend estimates the chance of success is only 20%. If you had the money, how much would you invest? |

Financial behavior: by considering the following statements, please express your perceptions on a five-point scale (1 = strongly disagree, 2 = disagree, 3 = neutral, 4 = agree, 5 = strongly agree) (Dew & Xiao, 2011)58

| **Questions** | **Measures** |
| --- | --- |
| Question 1 | I keep my expenditures under control |
| Question 2 | I plan my financial future |
| Question 3 | I save money |
| Question 4 | Before big purchases, I analyze my financial situation |
| Question 5 | I check my credit card accountability for possible errors and debts |
| Question 6 | I know how I will pay when I use a credit card |
| Question 7 | I set long-term financial goals that affect my spending |
| Question 8 | I pay my credit cards on time to avoid paying extra fees |
